# Supplementary material
Source: ML conference proceedings conference paper supplement (https://openreview.net/forum?id=Pik26bc4Jx)

**Input Length**

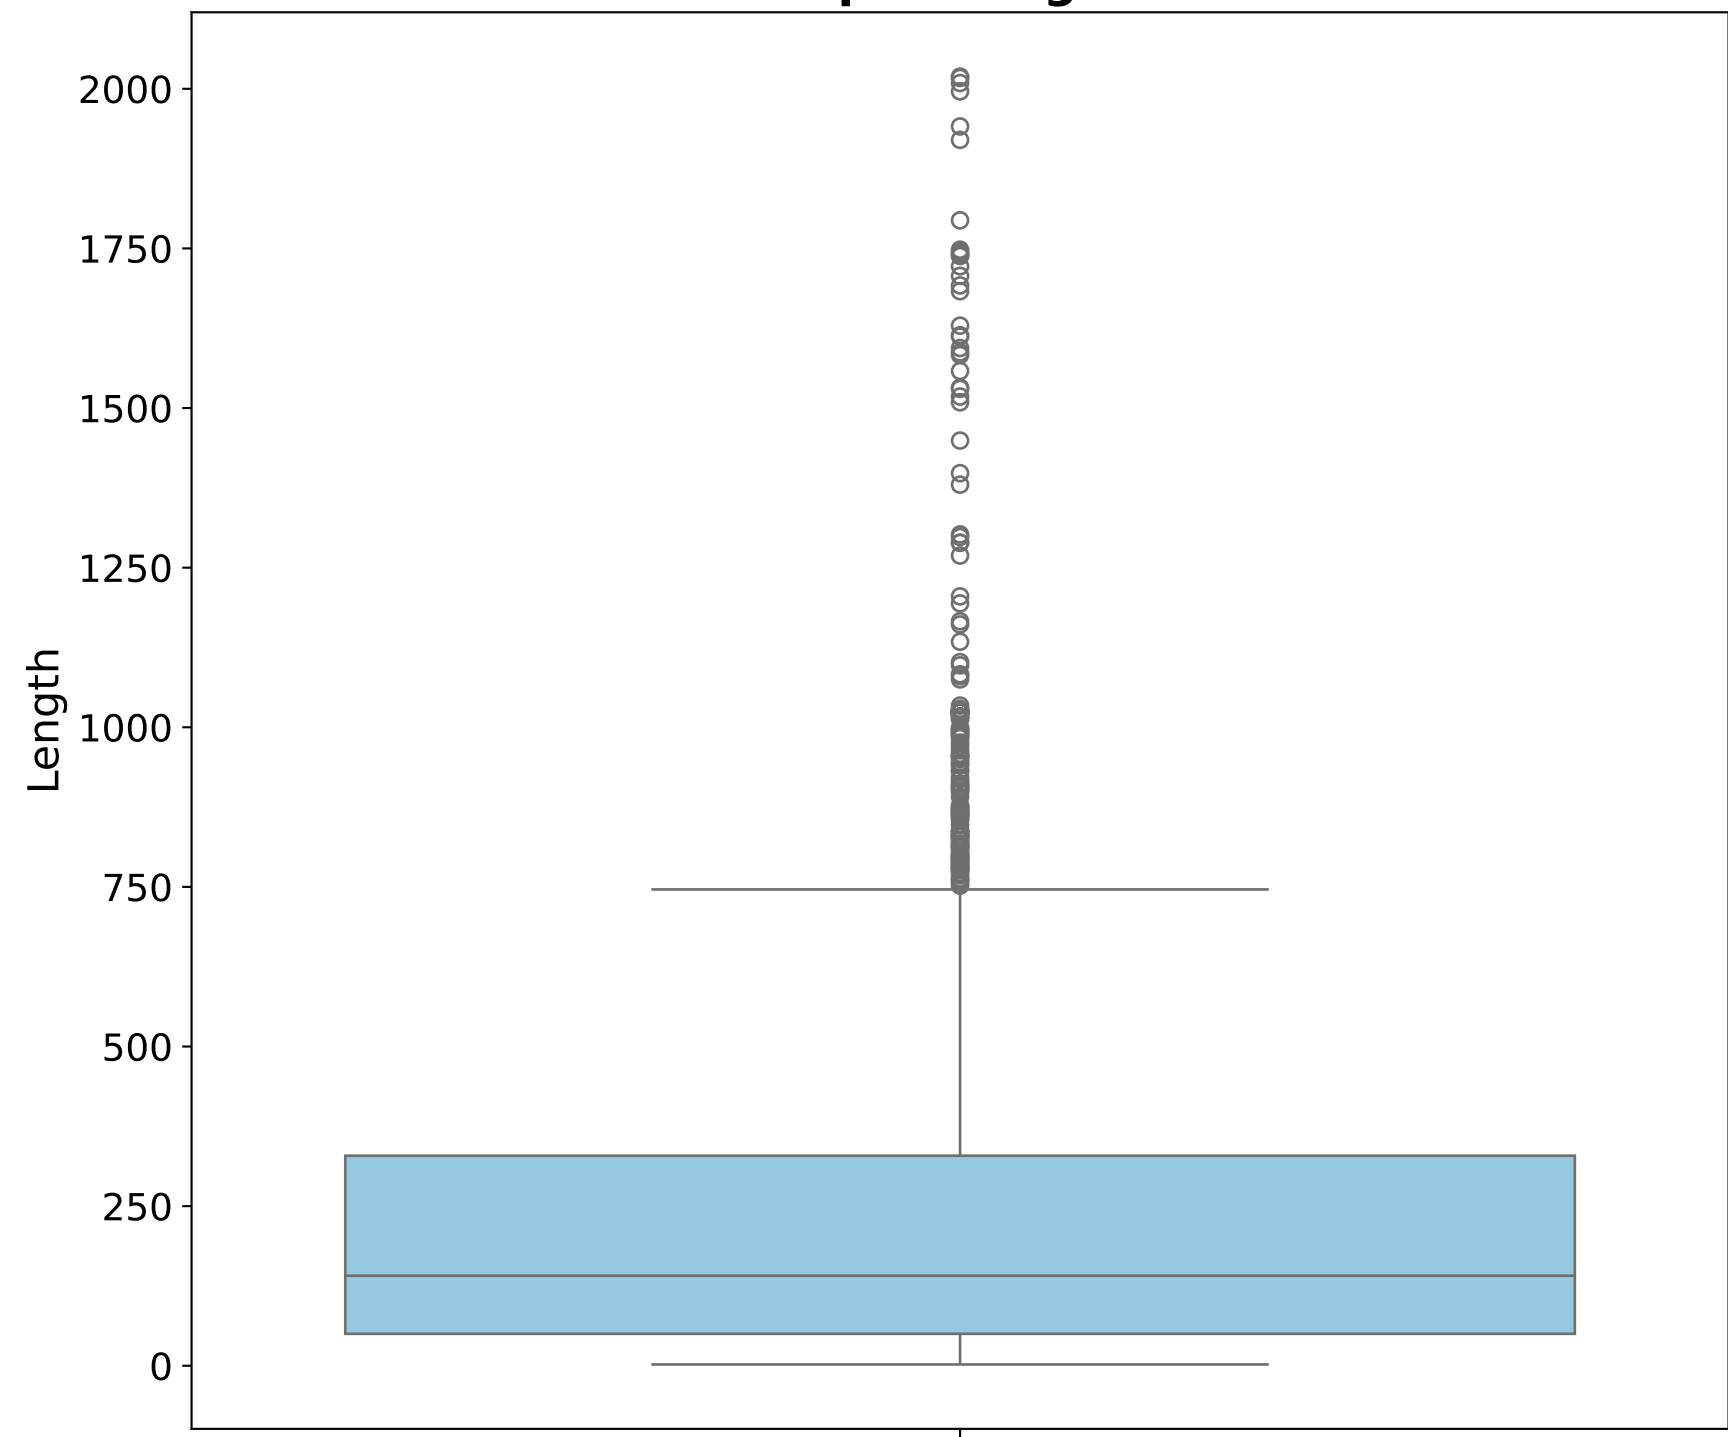

**Output Length**

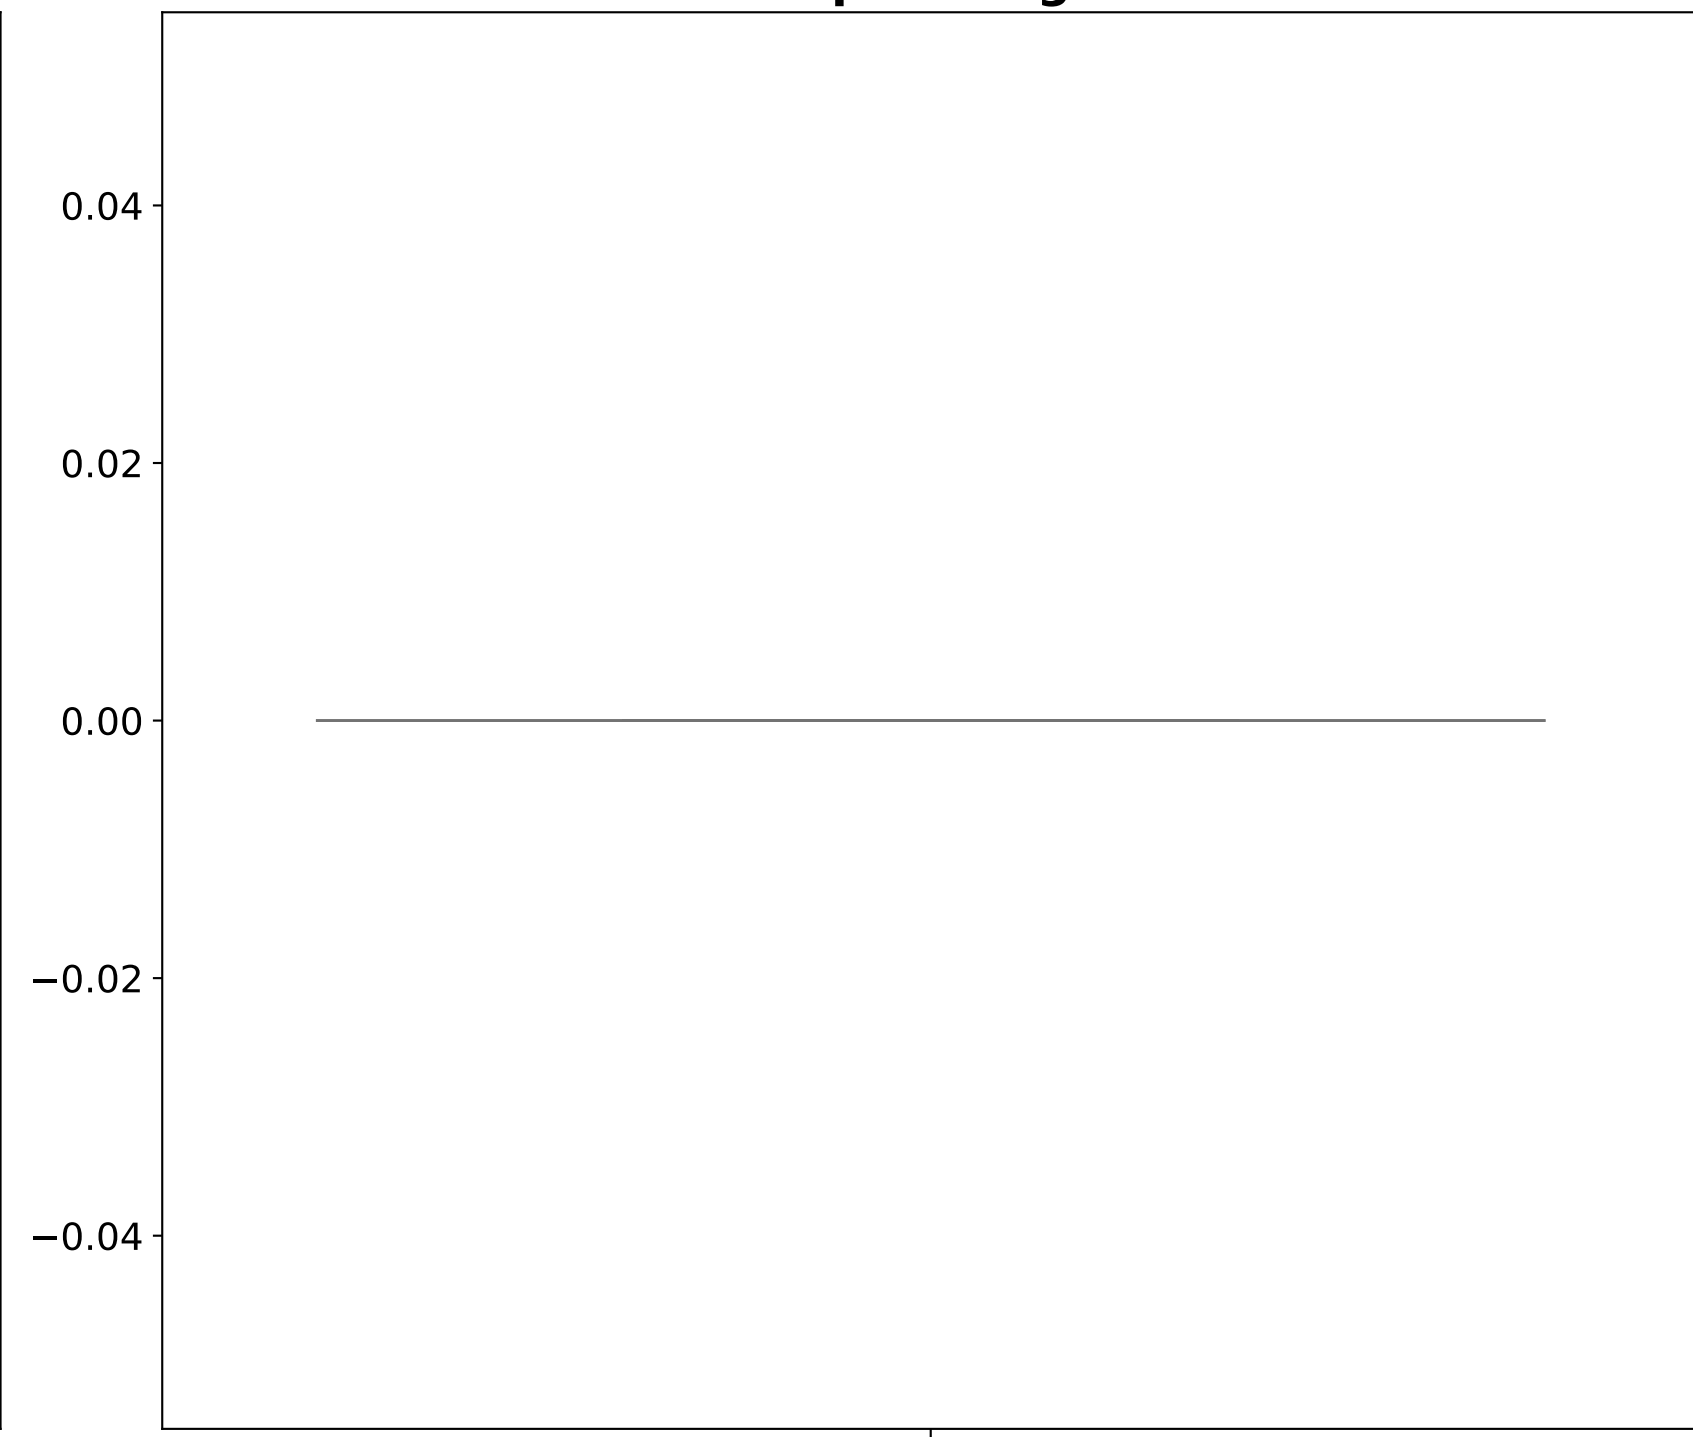

Supplement: supplementary_material [file attachment]

# Distribution of Tasks

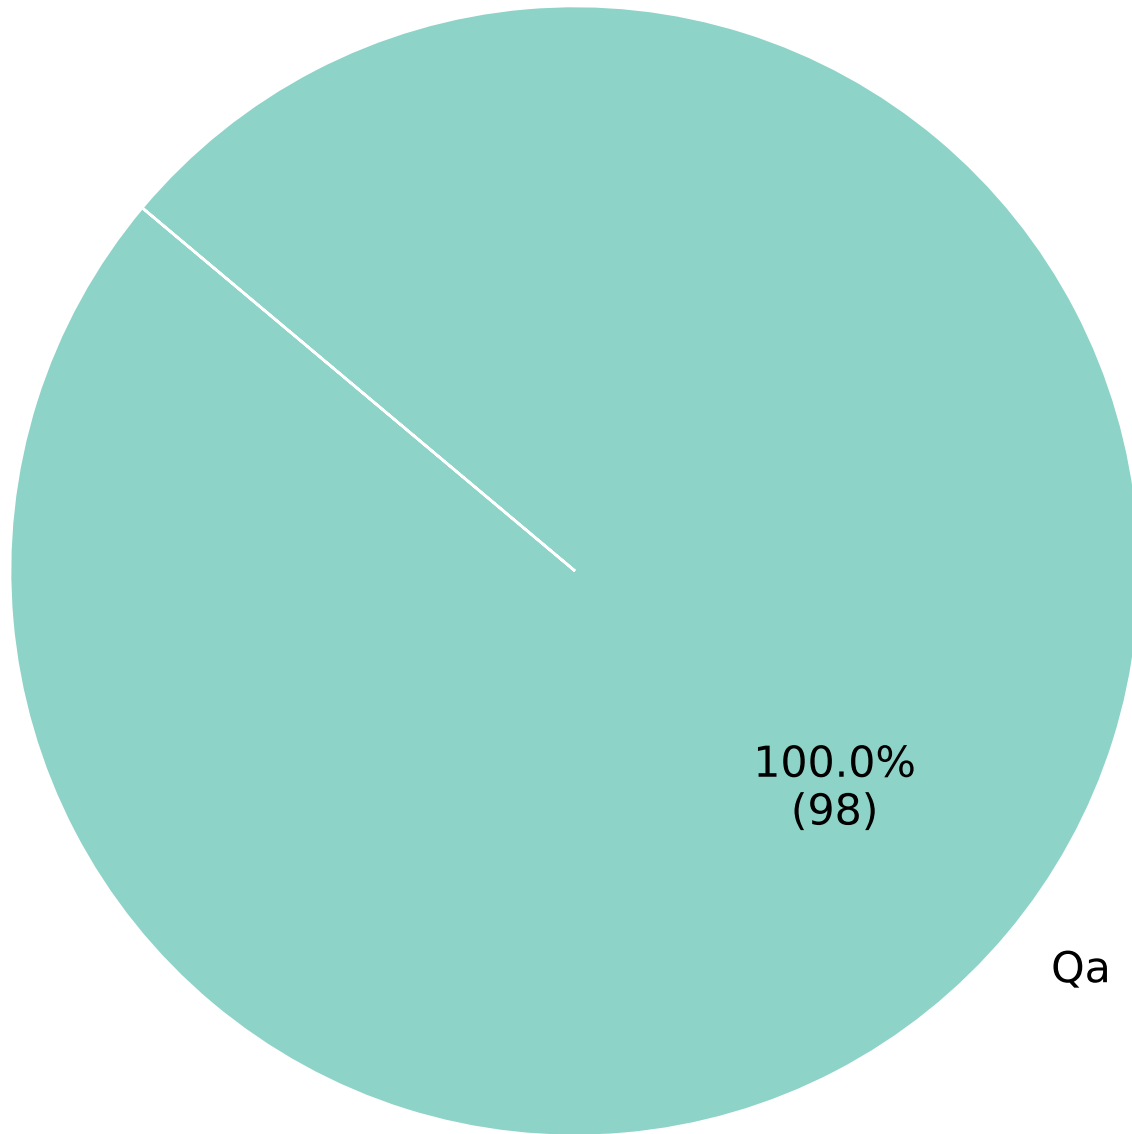

Supplement: supplementary_material [file attachment]

# Distribution of Tasks

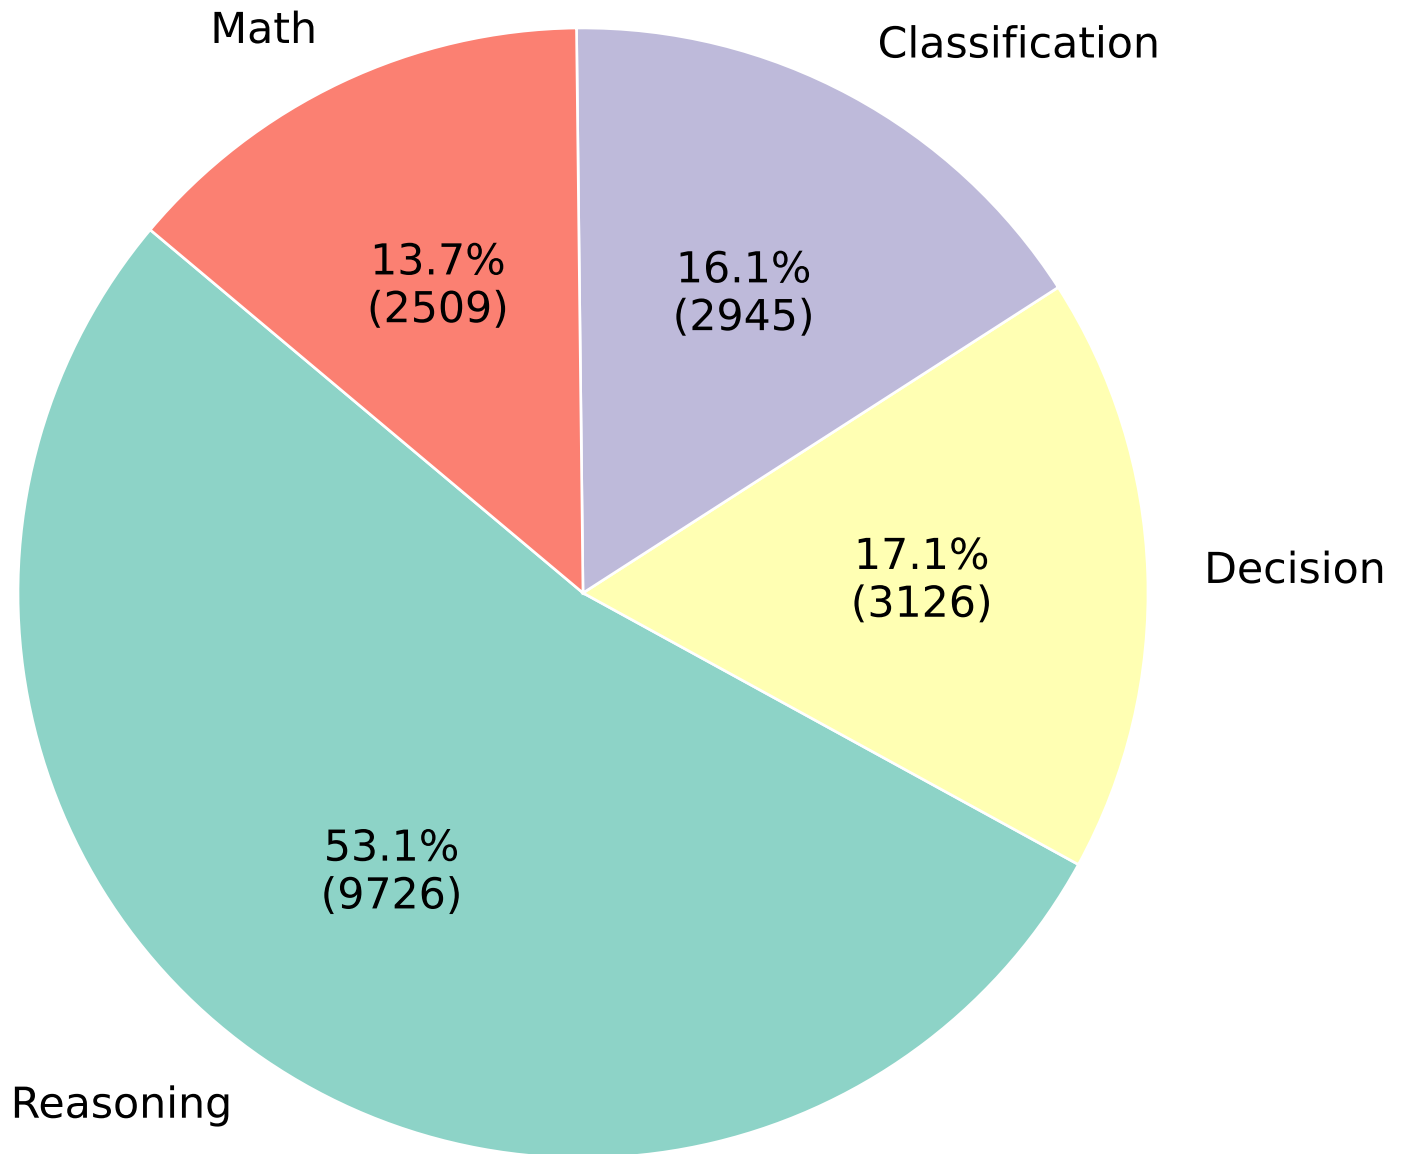

Supplement: supplementary_material [file attachment]

# Distribution of Tasks

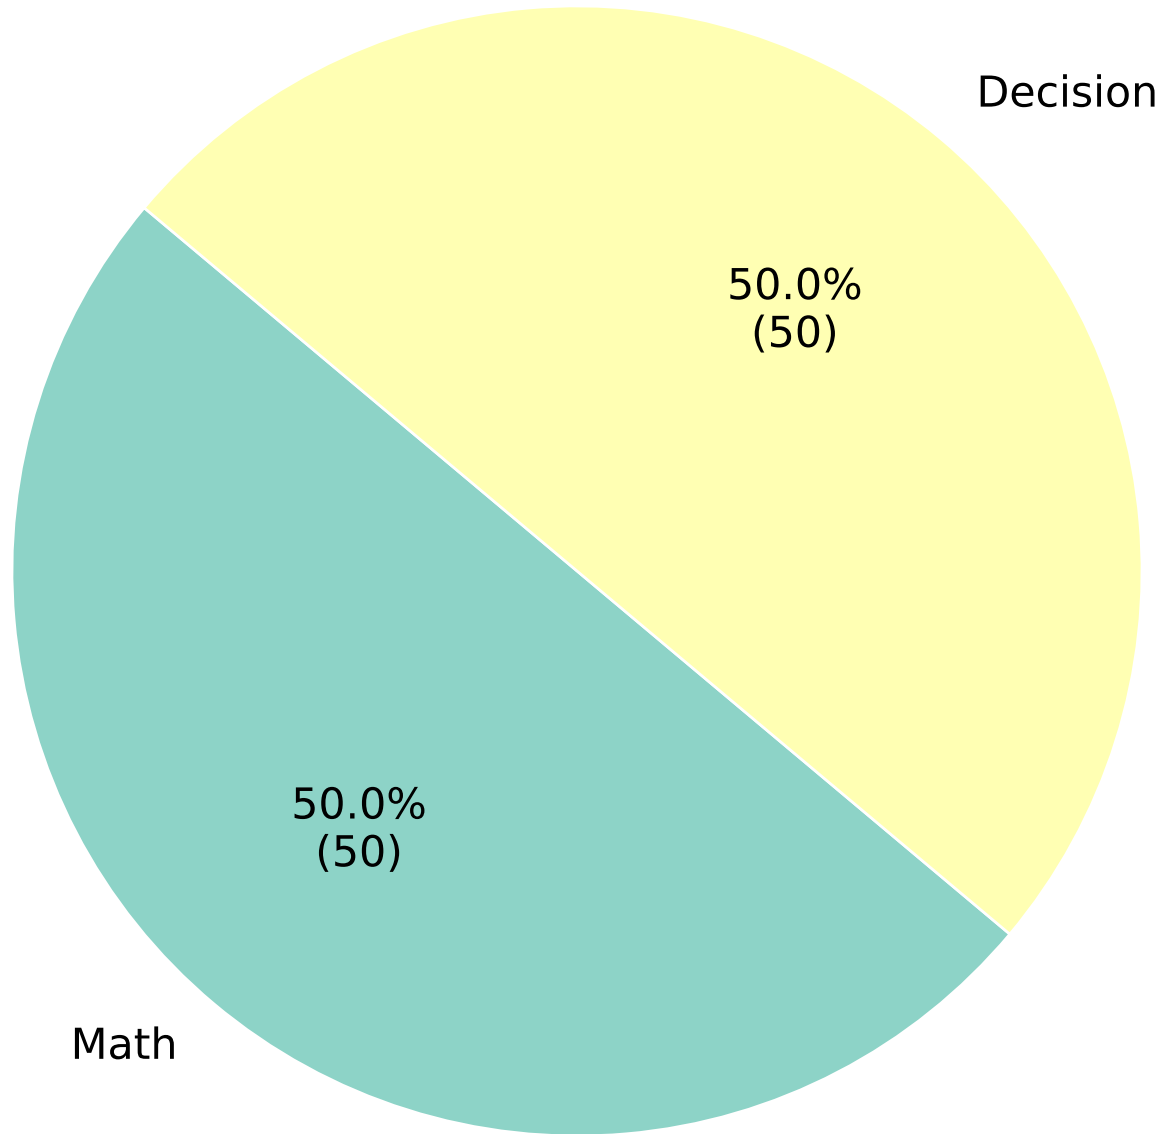

Supplement: supplementary_material [file attachment]

# Density Plot of Time-Series Lengths

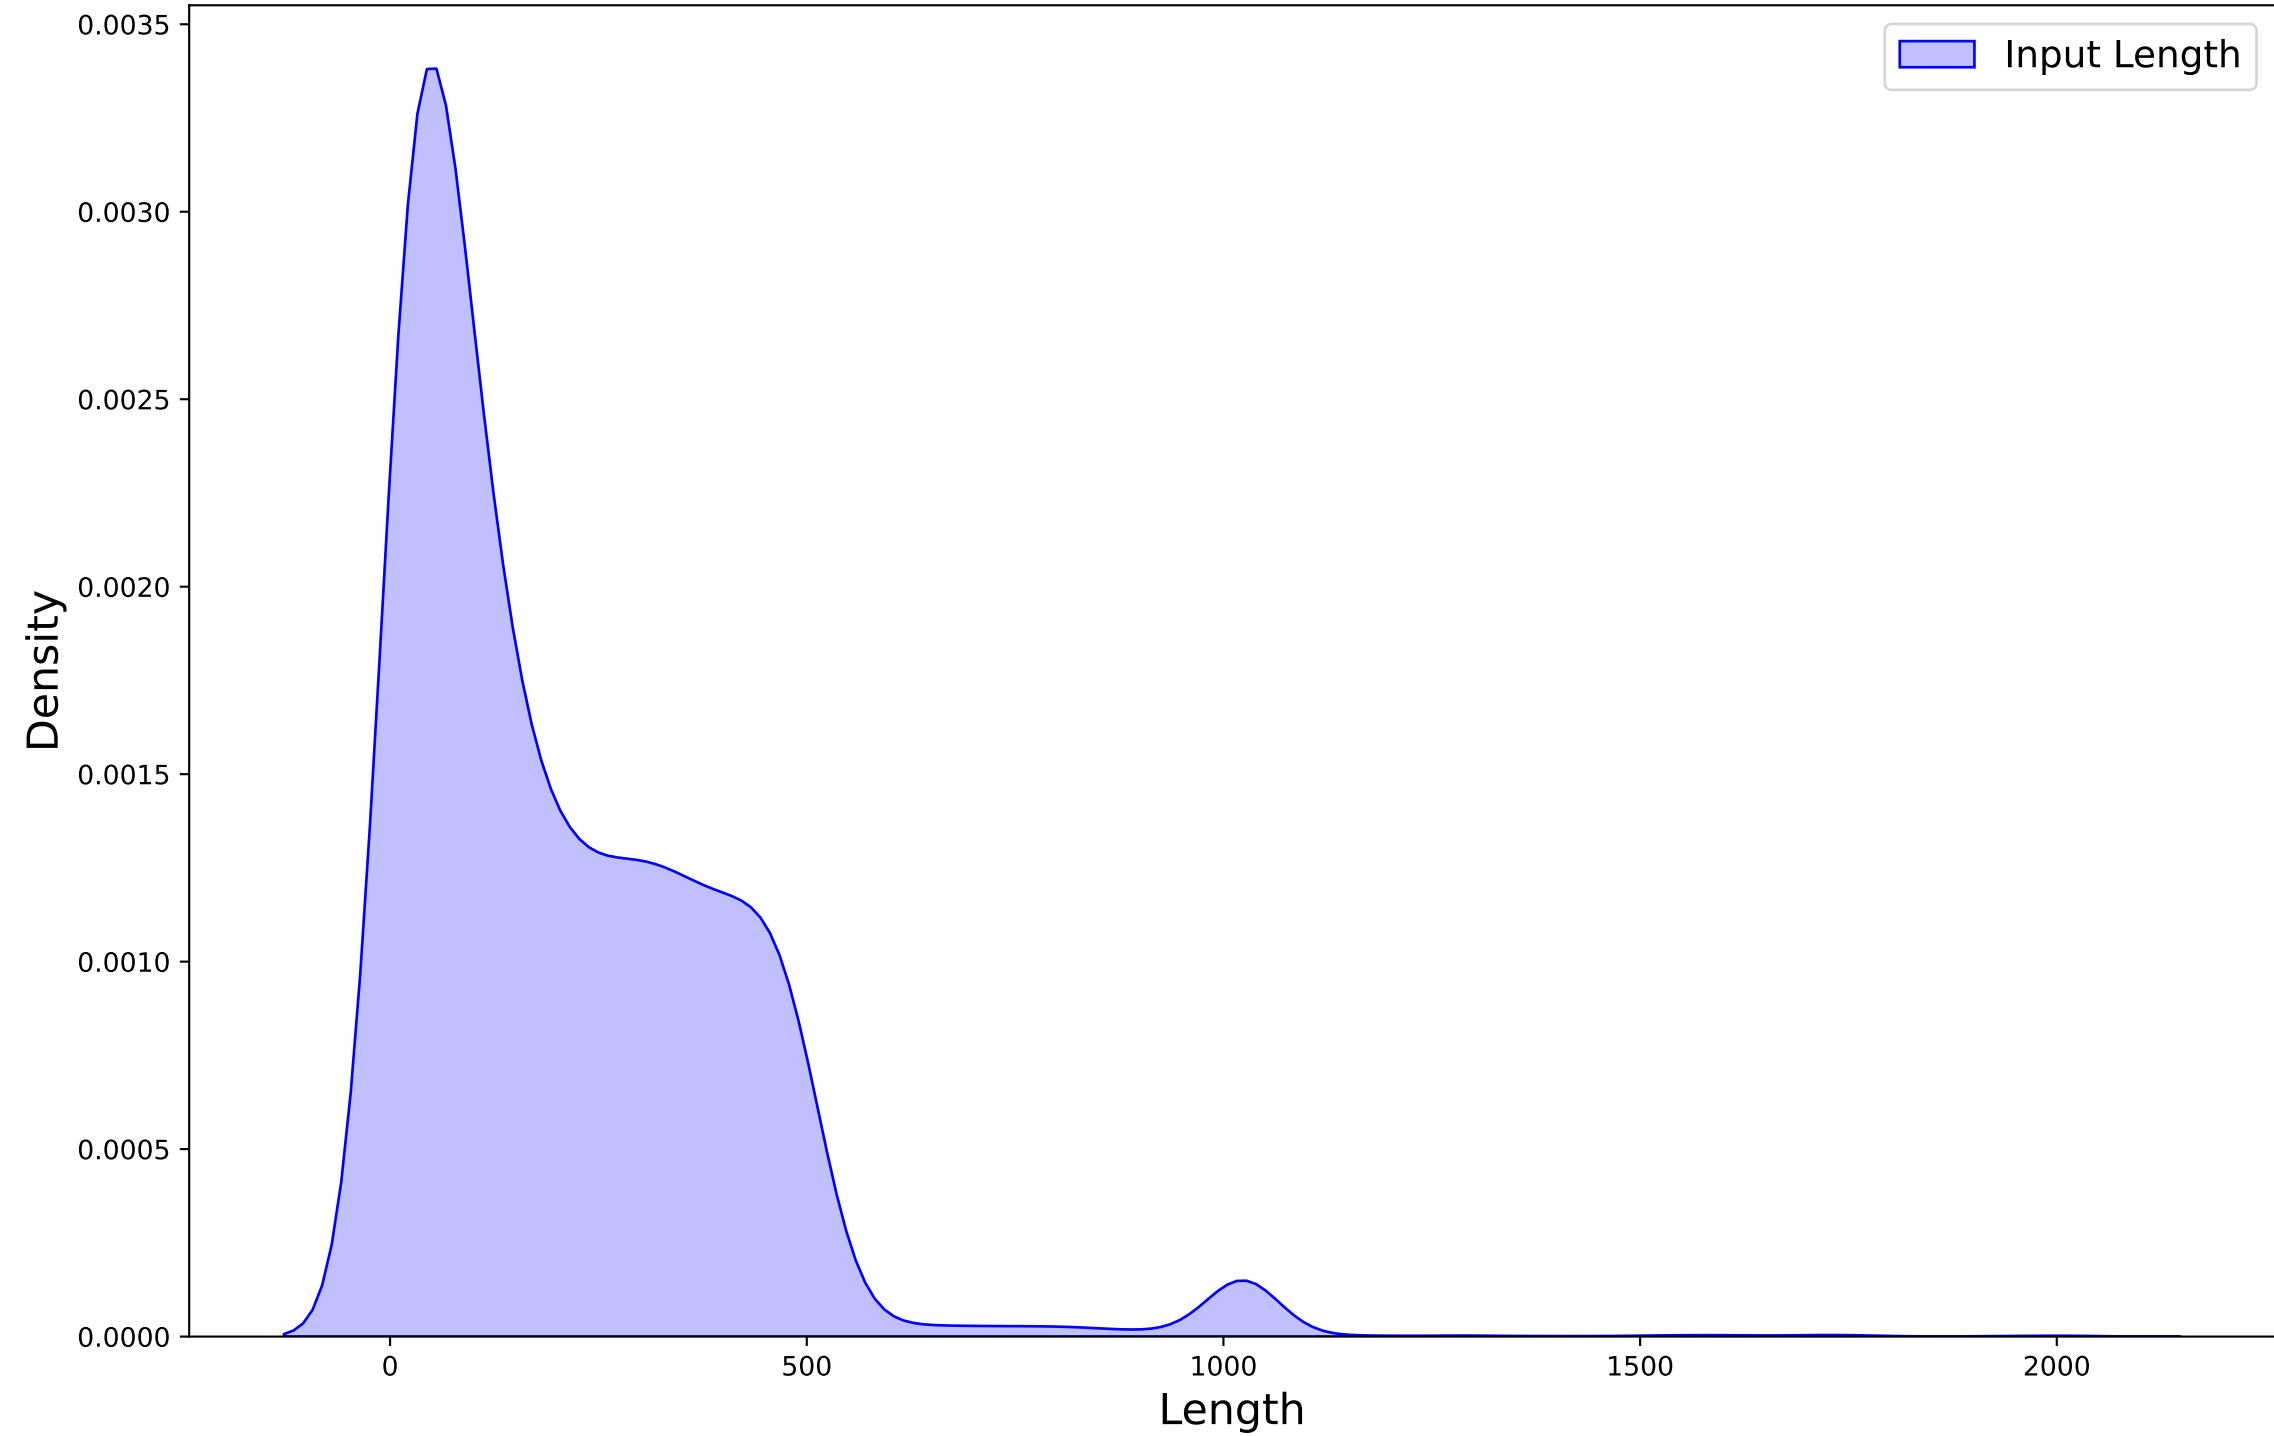

Supplement: supplementary_material [file attachment]

## Distribution of Tasks

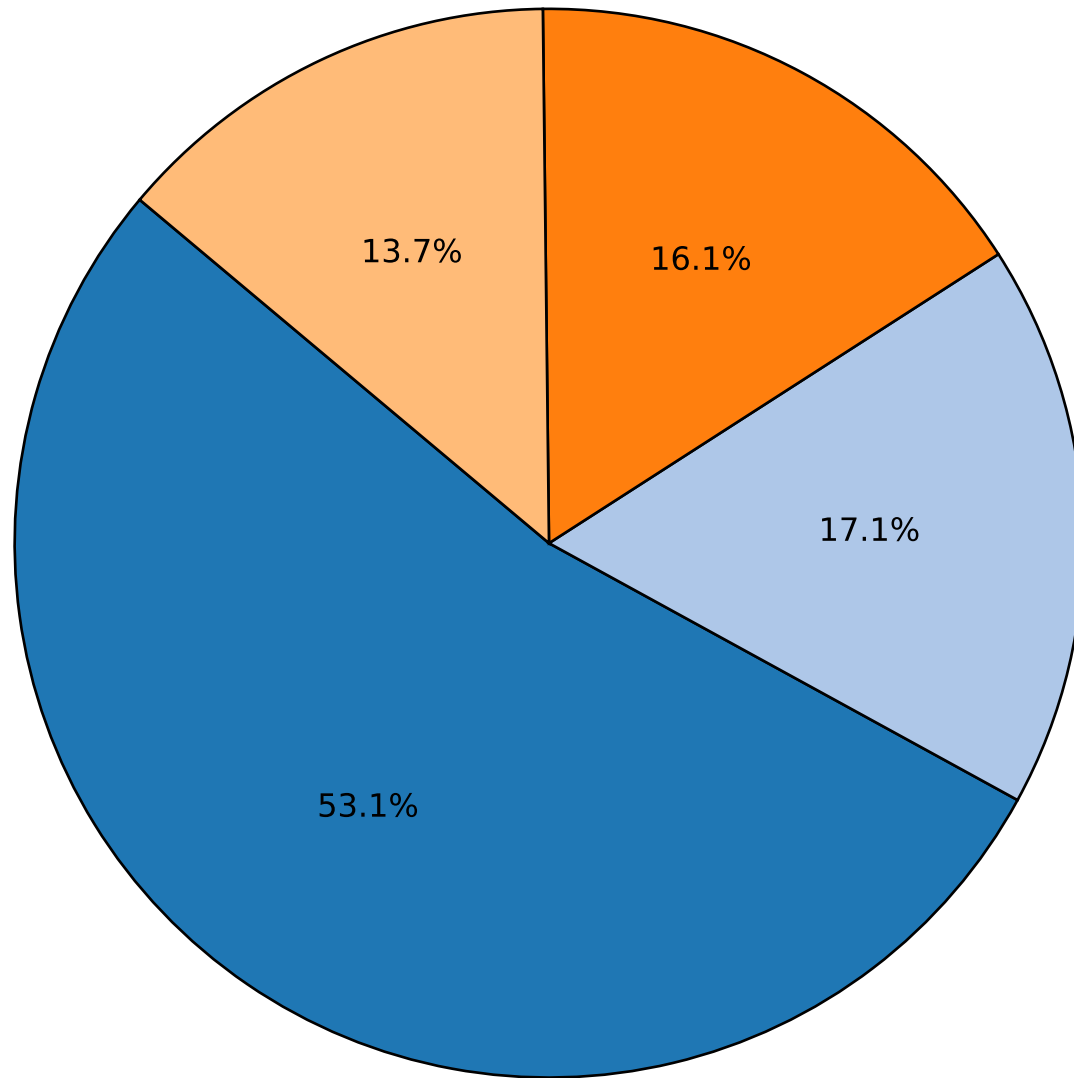

| Task           | Count |
|----------------|-------|
| Total Samples  | 18306 |
| reasoning      | 9726  |
| decision       | 3126  |
| classification | 2945  |
| math           | 2509  |

Supplement: supplementary_material [file attachment]

**Input Length**

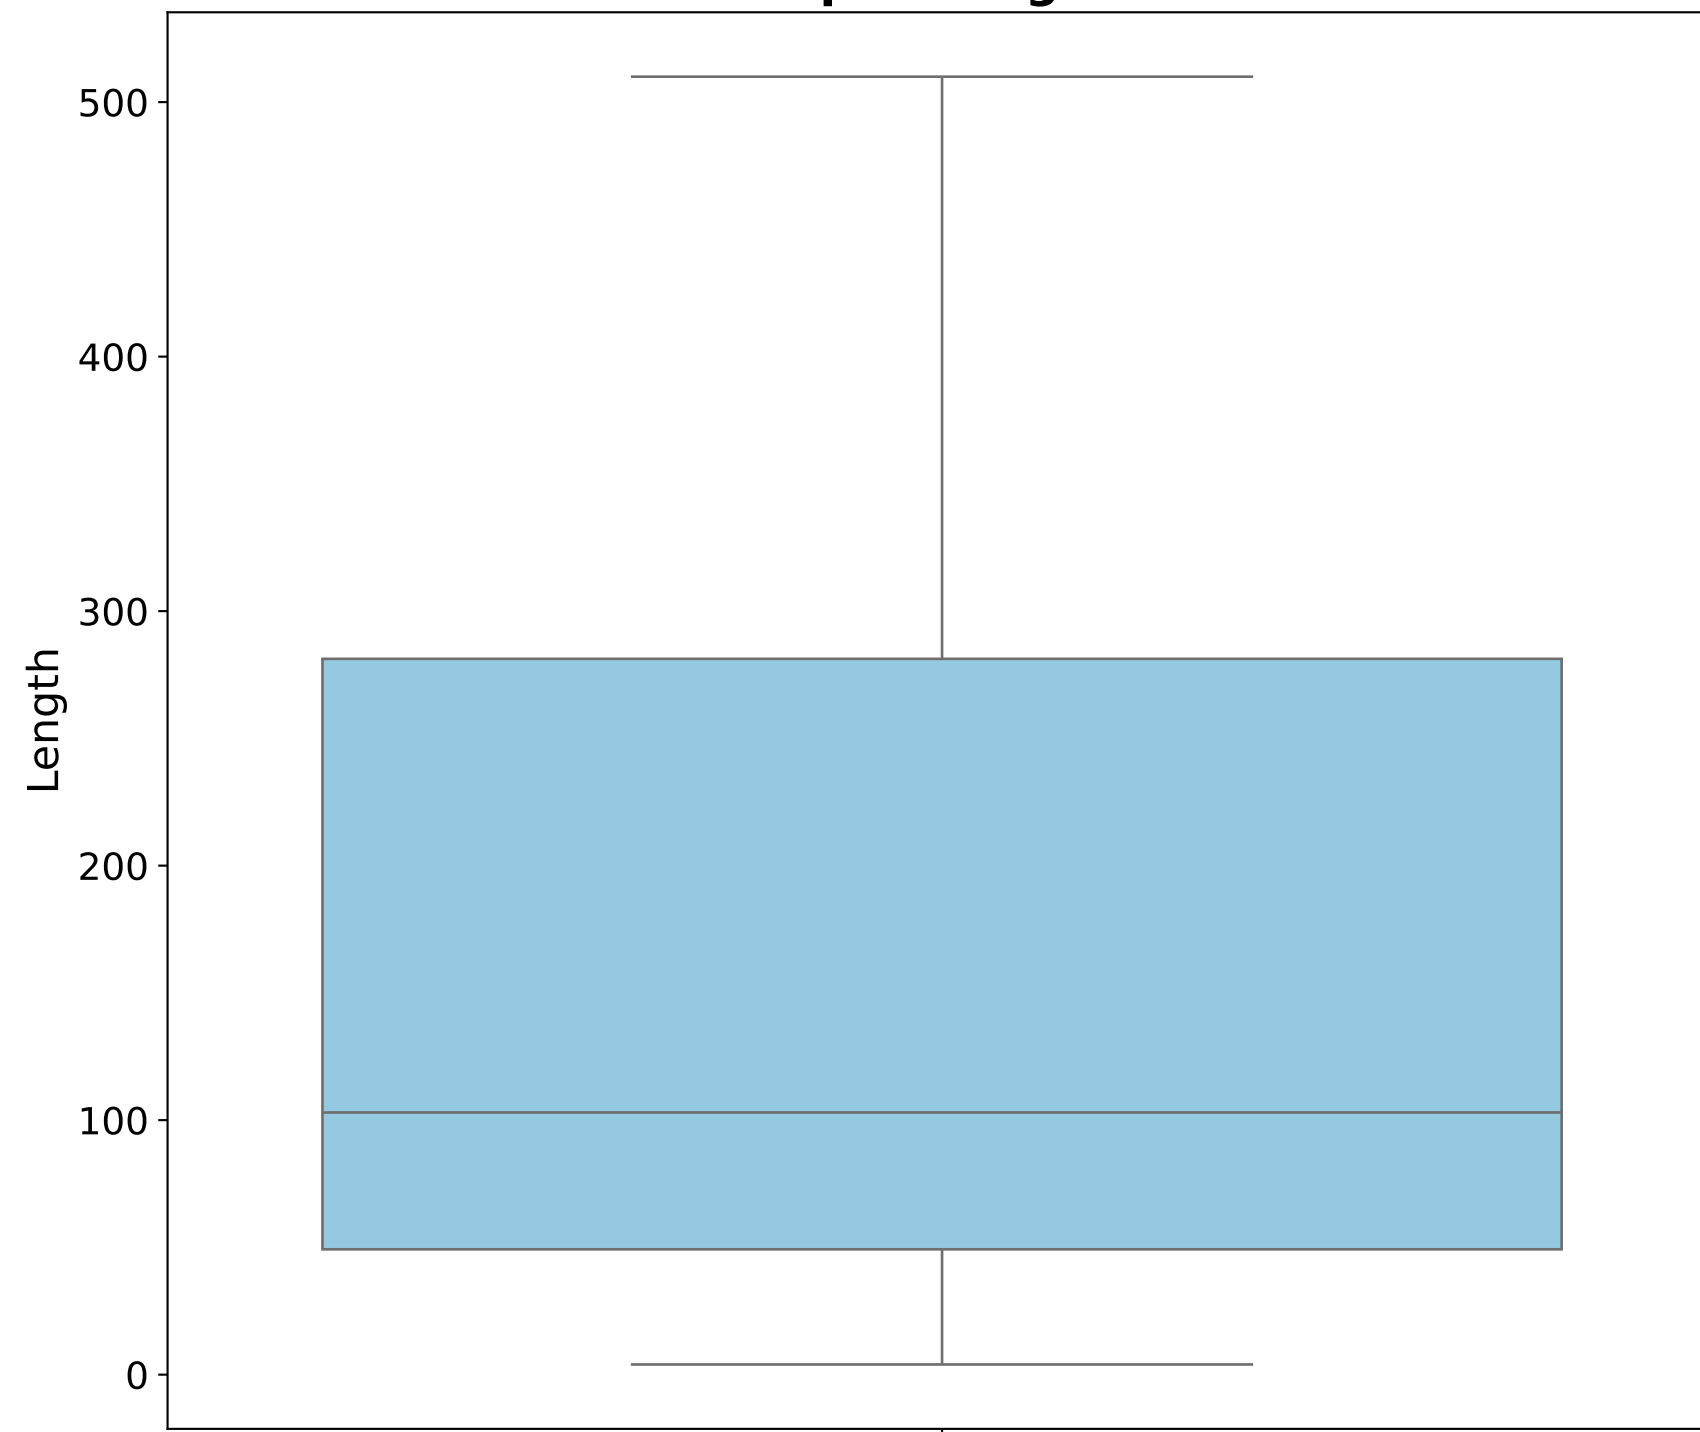

**Output Length**

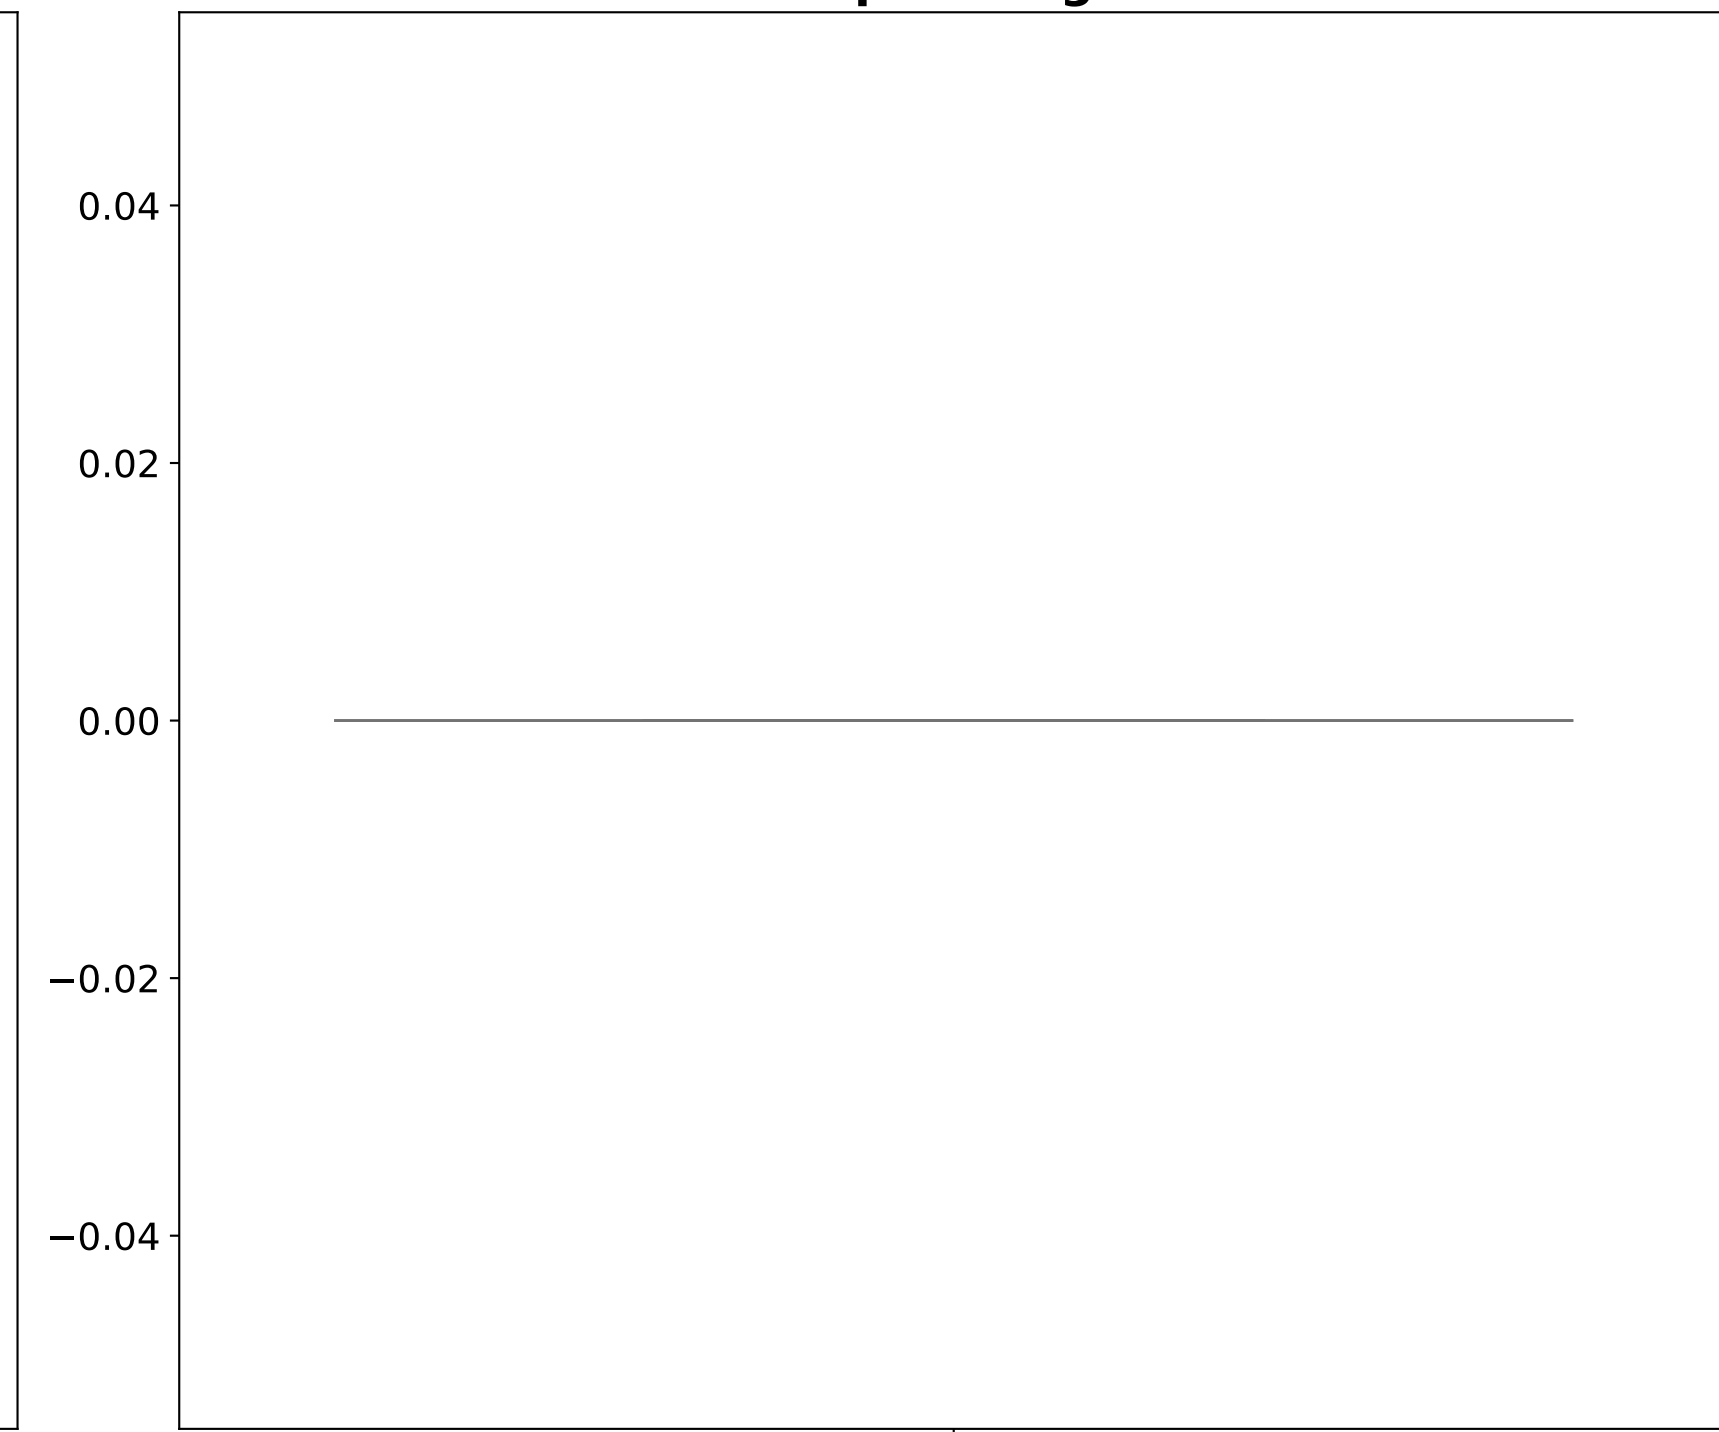

Supplement: supplementary_material [file attachment]

**Input Length**

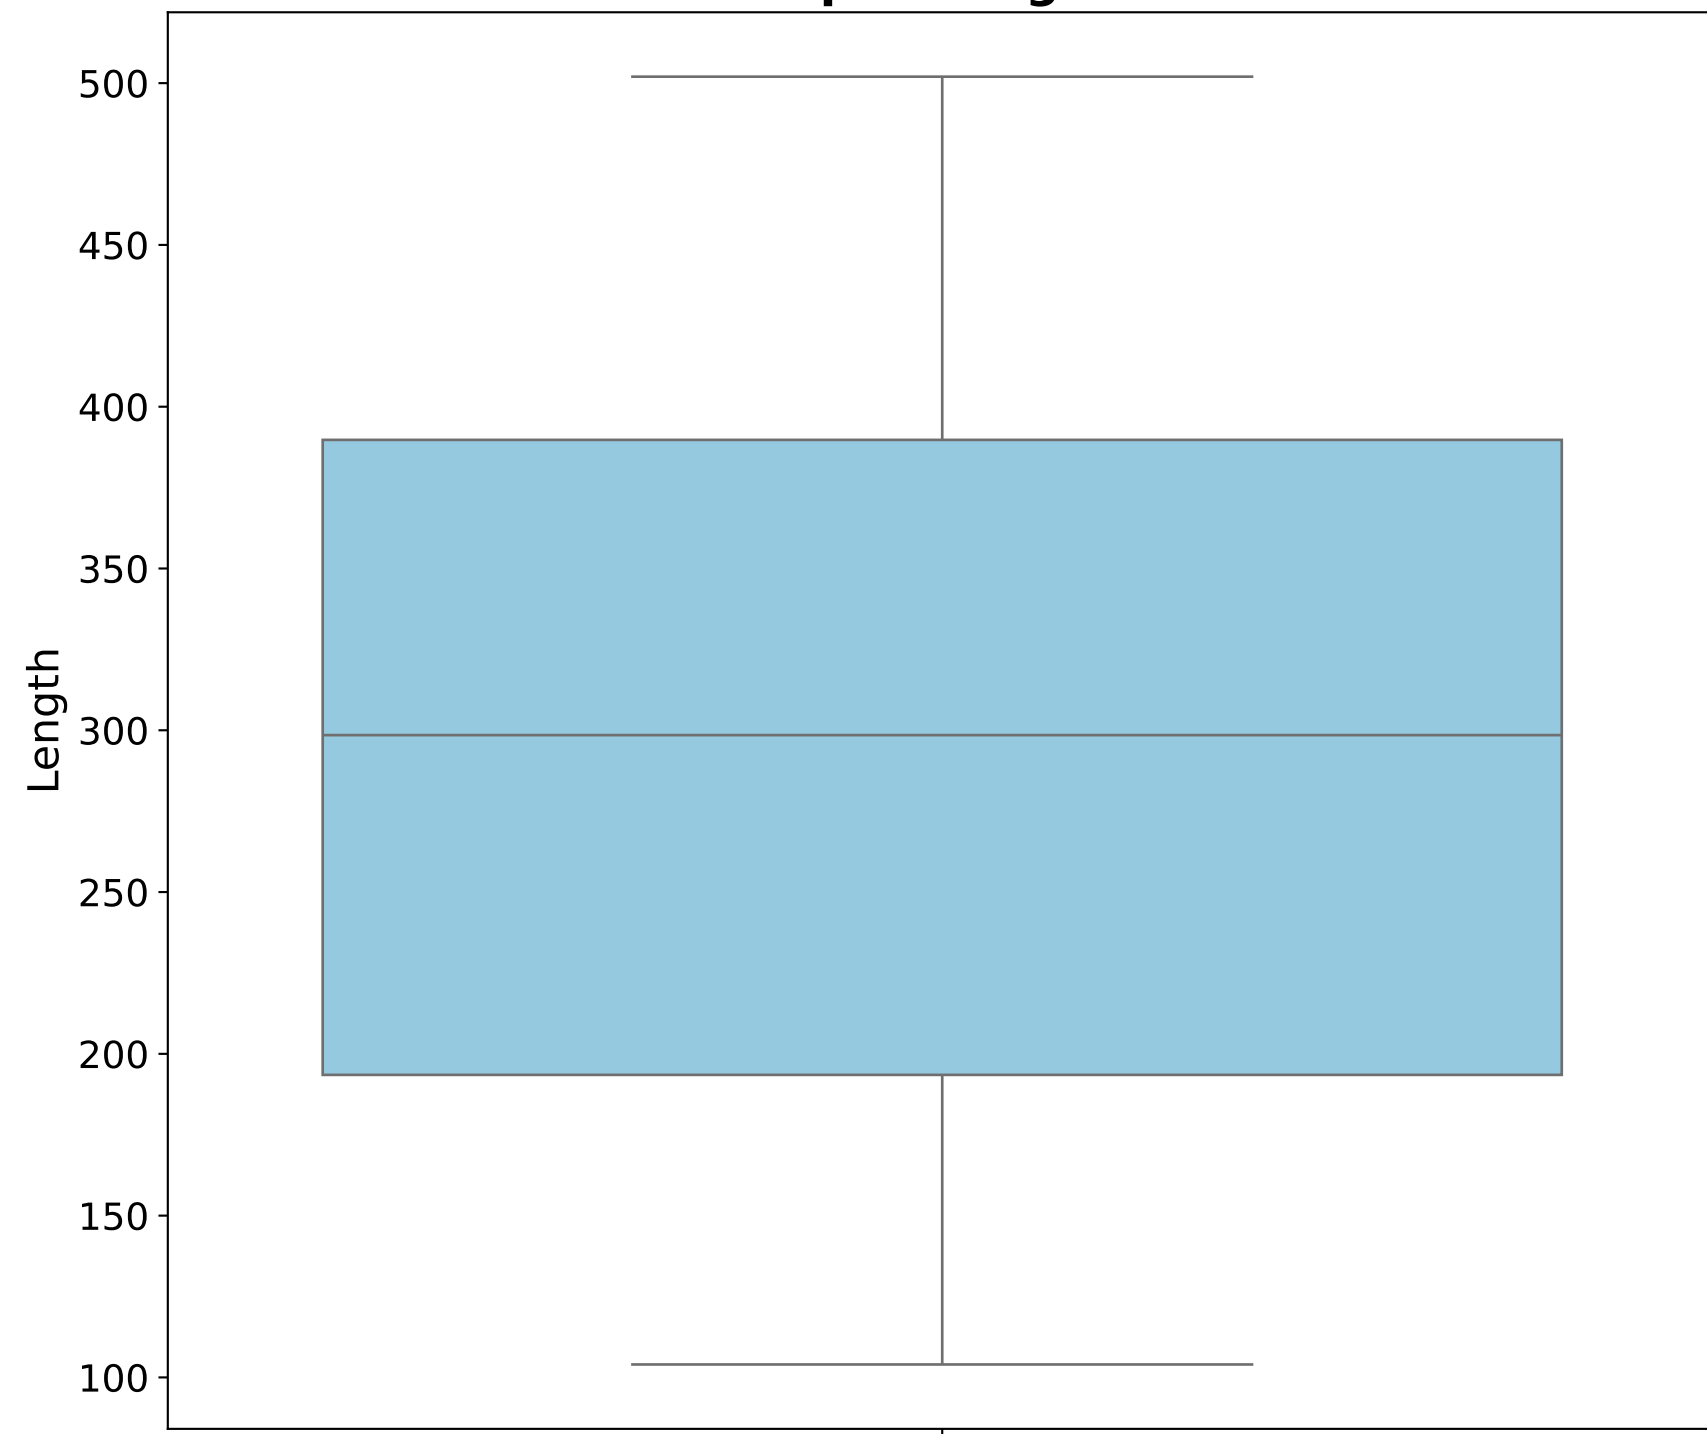

**Output Length**

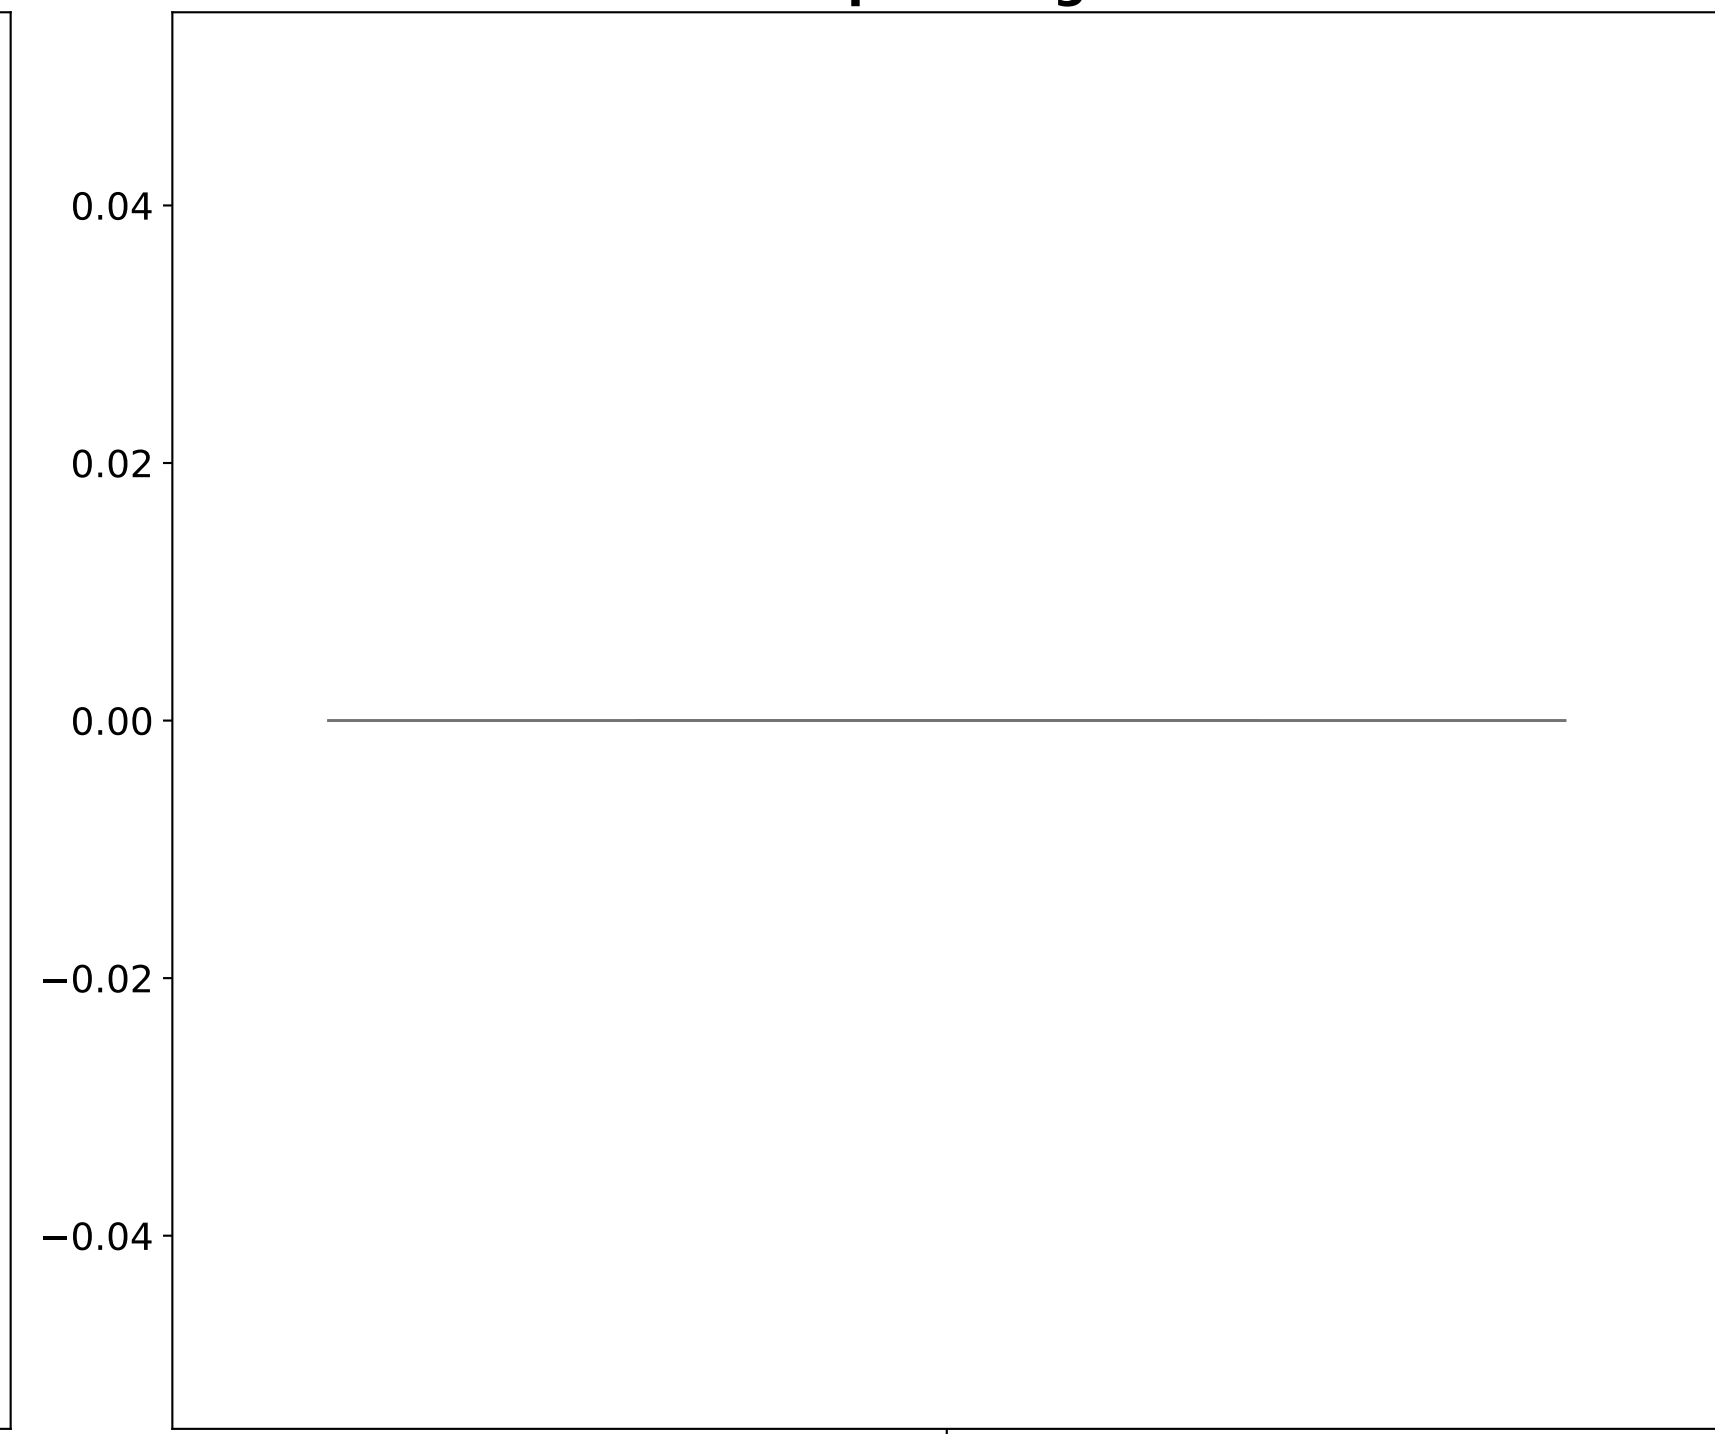

Supplement: supplementary_material [file attachment]
